# Supplementary material for: Prediction of thermodynamic properties of adsorbed gases in zeolitic imidazolate frameworks
Source: Royal Society of Chemistry journal article supplement (doi:10.1039/c2ra00025c), 2012-01-01
Supplement: c2ra00025c.pdf [file c2ra00025c.pdf]

## Supplementary information:

### Prediction of thermodynamic properties of adsorbed gases on Zeolitic Imidasolate frameworks using a molecular simulation-QSPR approach

Hedi Amrouche<sup>1,2</sup>, Benoit Creton<sup>1</sup>, Flor Siperstein<sup>2</sup>, Carlos Nieto-Draghi<sup>1,\*</sup>

<sup>1</sup>IFP Energies nouvelles, 1 et 4, Avenue de Bois-Préau 92852 Rueil-Malmaison, France,  
<sup>2</sup>School of Chemical Engineering and Analytical Science The University of Manchester, PO  
\*[carlos.nieto@ifpen.fr](mailto:carlos.nieto@ifpen.fr)

#### 1 Solid structures

The structures used are distributed around three different topologies : The SOD structures includes ZIF-8 (C<sub>4</sub>H<sub>5</sub>N<sub>2</sub>, **mIm**), ZIF-90 (C<sub>4</sub>H<sub>3</sub>N<sub>2</sub>O, **Ica**), ZIF-COOH (C<sub>4</sub>H<sub>3</sub>N<sub>2</sub>O<sub>2</sub>, **carboIm**), ZIF-NO<sub>2</sub> (C<sub>3</sub>H<sub>2</sub>N<sub>4</sub>O<sub>2</sub>, **nIm**) and ZIF-Cl (C<sub>3</sub>N<sub>2</sub>H<sub>2</sub>Cl, **cIm**). The functional groups are placed on position 2 of the imidazolate linker. In ZIF-8, sodalite cages are connected by 6-rings, i.e. windows with 6 Zn atoms. The free diameter of the sodalite cages is about 1.16 nm. The imidazolate linkers point towards the centre of the 6-ring, which connects two sodalite cages. The free diameter of the opening of the 6-ring is about 0.3-0.34 nm. The RHO topology contains four structures : ZIF-71 (C<sub>3</sub>H<sub>2</sub>N<sub>2</sub>Cl<sub>2</sub> **dcIm**), ZIF-93 (C<sub>5</sub>H<sub>6</sub>N<sub>2</sub>O **almeIm**), ZIF-96 (C<sub>4</sub>H<sub>4</sub>N<sub>4</sub> **cyamIm**) and ZIF-97 (C<sub>5</sub>H<sub>8</sub>N<sub>2</sub>O **hymeIm**). The functional groups are placed in the -4 and -5 positions. According the literature<sup>[1],[2],[3],[4]</sup>, these positions are favourable to produce ZIFs with RHO topology. This topology is constructed from a body-centered arrangement in which the largest cage is [4<sup>12</sup>.6<sup>8</sup>.8<sup>6</sup>] cage. (the symbol [...*m*<sup>*n*</sup>....] indicates that *n* faces of the cage are *m*-membered rings). Their structures and their capacity to capture carbon dioxide have been investigated by W. Morris et al<sup>[5]</sup>, who provides solid structures that were used in this work. The GME series is made up of five solids: ZIF-68 (C<sub>7</sub>H<sub>5</sub>N<sub>2</sub> **bIm**), ZIF-69 (C<sub>7</sub>H<sub>4</sub>N<sub>2</sub>Cl **cbIm**), ZIF-78 (C<sub>7</sub>H<sub>5</sub>N<sub>3</sub>O<sub>2</sub> **nbIm**), ZIF-79 (C<sub>8</sub>H<sub>8</sub>N<sub>2</sub> **mIm**), ZIF-81 (C<sub>7</sub>H<sub>5</sub>N<sub>2</sub>Br **bbIm**). GME structures are made up of two different linkers: C<sub>3</sub>H<sub>2</sub>N<sub>4</sub>O<sub>2</sub> **nIm**

linkers, which are common to the whole GME family, and another substituted bIm (which are **bIm**, **cbIm**, **nbIm**, **mIm** and **bbIm**). As illustrated in Figure 1, the GME structures can be described as the assembling of *kno* [ $4^3.8^3.12^2$ ] cages forming channels of 12-membered rings, cross-linked *gme* [ $4^9.6^2.8^3$ ] cages and *hpr* [ $4^6.6^2$ ] cages in a 1:1:1 ratio. The **nbIm** links occupy the same position in all solids (two edges which are part of the *hpr* cages), the others substituted bIm's occupy the remaining edges. The substituted bIm's point into the voids of the *kno* cage. Consequently, depending on the functional groups, the pore diameter of the *kno* cage vary from 7.3 to 9.9 Å. Due to their adjustable pore size and highly electrostatic nature the GME are one of the most studied ZIFs in the literature<sup>[6,7,8,9,10]</sup>. A detailed information of the volume fraction of different pores and channels of GME structure is provided in Table B.

An interesting point for discussion is the permeability of the selected structures for all gases considered. The concept of pore window is somewhat artificial for judging the permeability of ZIF materials, due to the high flexibility of the organic linkers. In fact, ZIF-7 and SIM-1 are ZIF materials with small window apertures ( $\leq 3$  Å) that allow CO<sub>2</sub> and bulky hydrocarbon molecules to diffuse inside their pores.<sup>11,12,13</sup>

The topological and structural information of the ZIF solids studied in this chapter are listed in Table B. The molecular structure of each material was taken from the CCDB<sup>14</sup> or from the original references. In certain cases, where hypothetical solids are considered, the framework has been optimized through VASP periodic DFT calculations.<sup>15</sup>

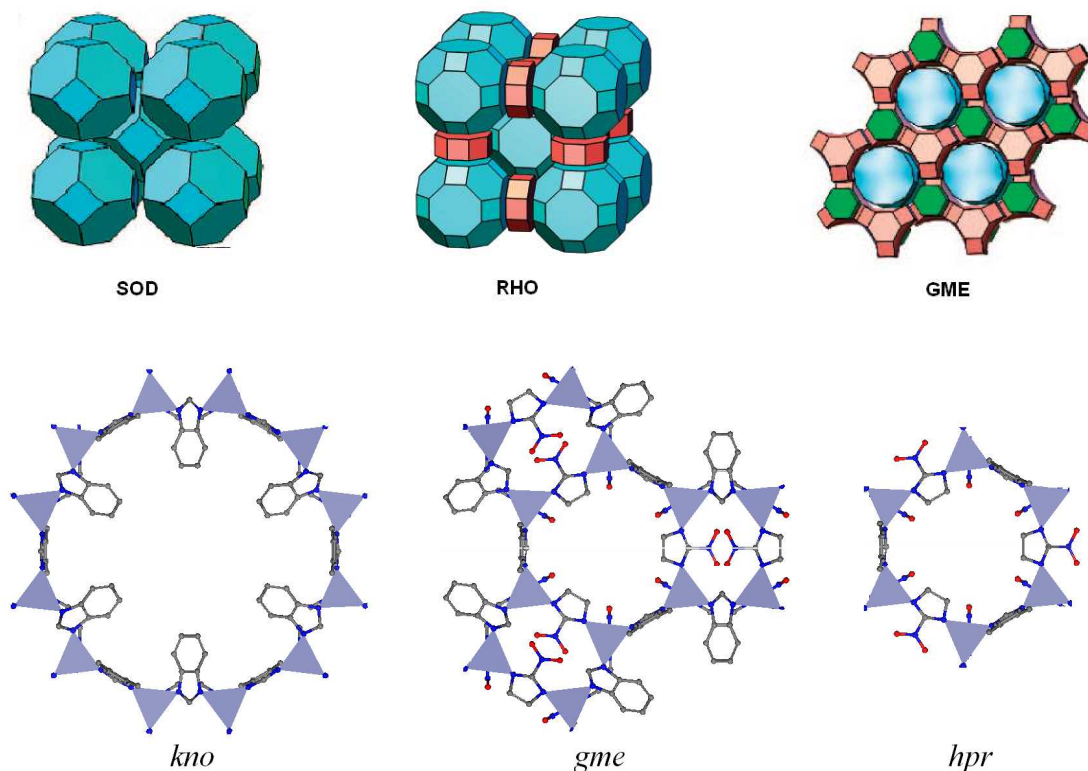

Figure 1 : The tiling of the SOD, RHO and GME structures representing the subdivisions of space (top). Schematic representation of the different types of cages present in GME : *kno*, *gme* and *hpr*. Image of topologies were taken from ref.[3],ref.[5] and ref.[2], respectively.

**Tab. A: Details of pore volume fraction ( $\vartheta$ ) for different channels (*hpr*) and pores (*kno*) of the GME structures (see Figure 1 for details).**

| <b>gme</b> | <b><math>\mu</math> Rblm (D)</b> | <b><math>\mu</math> nlm (D)</b> | <b><math>V_T</math> of <i>hpr</i> (<math>\text{\AA}^3</math>)</b> | <b><math>V_T</math> of <i>kno</i> (<math>\text{\AA}^3</math>)</b> | <b>V-free (<math>\text{\AA}^3</math>)</b> | <b><math>\vartheta_{\text{channel}}</math></b> | <b><math>\vartheta_{\text{pore}}</math></b> | <b>Total <math> \mu </math></b> |
|------------|----------------------------------|---------------------------------|-------------------------------------------------------------------|-------------------------------------------------------------------|-------------------------------------------|------------------------------------------------|---------------------------------------------|---------------------------------|
| ZIF-68     | 1.48                             | 7.44                            | 12966.98                                                          | 2031.16                                                           | 14998.14                                  | 0.86                                           | 0.14                                        | 6.63                            |
| ZIF-79     | 1.72                             | 8.67                            | 8509.99                                                           | 829.16                                                            | 9339.15                                   | 0.91                                           | 0.09                                        | 8.05                            |
| ZIF-81     | 1.81                             | 8.02                            | 11879.74                                                          | 985.47                                                            | 12865.21                                  | 0.92                                           | 0.08                                        | 7.55                            |
| ZIF-69     | 1.88                             | 8.02                            | 12320.75                                                          | 924.74                                                            | 13245.49                                  | 0.93                                           | 0.07                                        | 7.59                            |
| ZIF-78     | 5.51                             | 9.25                            | 15722.25                                                          | 924.74                                                            | 16646.99                                  | 0.94                                           | 0.06                                        | 9.04                            |

$\mu$  Rblm and  $\mu$  nlm are the dipole moment of the substituted (R) blm and nlm linkers.  $V_T$  *hpr* and  $V_T$  *kno* corresponding to the total pore volume occupy for the *hpr* channel and *kno* pores in GME. V-free corresponds to the total free volume of the GME structure.

**Tab. B . List of ZIFs materials used in the QSPR database.**

| Name                  | Topology | Organic Linker | Cell volume [Å <sup>3</sup> ] | $d_p$ [Å] | $S_a$ [Å <sup>2</sup> /g] | $ \vec{\mu}_{OL} $ [D] | $ Q_{OL} $ [D.m] |
|-----------------------|----------|----------------|-------------------------------|-----------|---------------------------|------------------------|------------------|
| ZIF-8                 | SOD      | meIm           | 4917.50                       | 11.47     | 1395.14                   | 1.22                   | 8.97             |
| ZIF-90                | SOD      | IcaIm          | 5080.34                       | 10.88     | 1269.42                   | 3.51                   | 13.46            |
| ZIF-COOH*             | SOD      | carboIm        | 5131.07                       | 10.99     | 1261.1                    | 1.84                   | 13.83            |
| ZIF-NO <sub>2</sub> * | SOD      | nIm            | 4980.17                       | 10.61     | 949.78                    | 3.40                   | 12.65            |
| ZIF-Cl                | SOD      | cIm            | 4950.98                       | 11.10     | 1200.41                   | 0.33                   | 3.56             |
| ZIF-71                | RHO      | dcIm           | 23280.71                      | 17.76     | 1137.2                    | 0.52                   | 10.30            |
| ZIF-93                | RHO      | almeIm         | 22801.20                      | 17.04     | 968.13                    | 5.65                   | 25.54            |
| ZIF-96                | RHO      | cyamIm         | 22800.96                      | 16.96     | 1251.7                    | 5.20                   | 28.02            |
| ZIF-97                | RHO      | hymeIm         | 22983.57                      | 16.48     | 872.67                    | 5.04                   | 12.72            |
| ZIF-68                | GME      | bIm            | 22871.06                      | 9.90      | 1060.83                   | 1.48                   | 16.23            |
| ZIF-69                | GME      | cbIm           | 22871.06                      | 7.62      | 1003.1                    | 1.88                   | 17.05            |
| ZIF-78                | GME      | nbIm           | 22871.06                      | 7.62      | 928.77                    | 5.51                   | 19.60            |
| ZIF-79                | GME      | mbim           | 22871.06                      | 7.34      | 1012.54                   | 1.72                   | 10.49            |
| ZIF-81                | GME      | bbIm           | 22871.06                      | 7.78      | 984.41                    | 1.81                   | 17.26            |

$d_p$  is the pore diameter calculated with the material Studio package.  $S_a$  is the accessible surface area calculated using the method developed by Düren *et al*<sup>[16]</sup>.  $|\vec{\mu}_{OL}|$  and  $|Q_{OL}|$  are, respectively, the dipole and quadrupole moment of the organic linkers (see next section for details.). \*Hypothetical solids obtained by periodic DFT simulations

## 1.1 Correlative QSPR Method

We can identify two main types of descriptors, some associated with the solid and some associated with the adsorbed gases. With this procedure we obtain about 60 descriptors which are ready to feed into our database. Due to the large amount of data care must be taken to avoid redundant information. The correlation between descriptors has been analyzed as follows.

### 1.1.1 Correlation Between Descriptors

Given that the total number of molecular descriptors outweighs the number of molecules in the database (concerning solid linkers and gases), only the most relevant descriptors are retained for building the predictive QSPR equations. For example, descriptors which are highly correlated, i.e., hold essentially the same information, with respect to the target thermodynamic property, can be kept. Therefore, a correlation matrix was constructed. This  $m \times m$  matrix, with  $m$  equal to the number of descriptors plus one for the simulated property, contains the correlation coefficients as defined by Eq. 1 :

**Eq. 1**

$$r_{(X,Y)} = \frac{C_{(X,Y)}}{\sqrt{V_X V_Y}},$$

where X and Y denote descriptors or simulated values of the target property. V and C are respectively the variance and the covariance. Their expressions are detailed in Eq. 2 and Eq. 3 where n runs over the number of molecules of the data set.

**Eq. 2**

$$V_X = \frac{1}{n} \sum_{i=1}^n (X_i - \langle X \rangle),$$

and

**Eq. 3**

$$C_{(X,Y)} = \frac{1}{n} \sum_{i=1}^n (X_i - \langle X \rangle)(Y_i - \langle Y \rangle),$$

For two descriptors where X and Y are strongly correlated,  $r_{(X,Y)}$  is close to 1. Using the correlation matrix, only the descriptors that correlate well with the target property and poorly correlate with another descriptor can be conserved. Materials Studio 5.0 software was used in this work to analyze the correlation between descriptors as well as to perform the QSPR models.<sup>[17]</sup>

### 1.1.2 Multivariate Analysis

In most cases, QSPR studies consist of determining an equation which gives a reliable property reproduction. In this work, we have chosen the target predictive model to be linear as described by Eq. 4

**Eq. 4** 
$$P_{\text{calc.}} = \lambda_0 + \sum_i \lambda_i X_i,$$

where  $i$  runs over 1 to 5, which corresponds to the maximum number of descriptors admitted in the predictive equation and  $\lambda_i$  are weight factors. The method used to select the representative descriptors and to optimize the associated constants is the Genetic Function Approximation (GFA) available in the Materials Studio software. This approach starts by establishing an initial population of equations randomly chosen. The equation terms are viewed as strings, and the population evolves through iterative operations: selection, crossover, and mutation. During the evolution process, the constructed equations are scored using a slightly modified Friedman's lack-of-fit (LOF) method<sup>[17]</sup> evaluated by:

**Eq. 5** 
$$LOF = \frac{SSE}{M \left[ 1 - \lambda \left( \frac{c + dp}{M} \right) \right]^2},$$

where  $SSE$  is the sum of squares of errors,  $c$  is the number of terms in the models,  $d$  a scaled smoothing parameter,  $p$  the total number of descriptors contained in all model terms,  $M$  the

number of samples in the training set and  $\lambda$  is a safety factor, it ensure that the denominator of the expression can never be zero. By adding more terms to the regression models, the SSE may reduce, but also the values of  $c$  and  $p$  increase. Consequently it tends to increase the LOF score. Thus the choice of LOF model favour the equations with a low number of descriptors. The equations evolve until the convergence is observed, i.e., the scores are not further improved. Among all returned equations the best predictive equation is the one having the lowest Mean Absolute Error (MAE), defined as:

**Eq. 6** 
$$\text{MAE} = \frac{1}{n} \sum_{i=1}^n |P_{\text{sim.}} - P_{\text{calc.}}|,$$

where,  $i$  runs over the  $n$  compounds of the data set,  $P_{\text{sim.}}$  and  $P_{\text{calc.}}$  are respectively the experimental and the calculated property. Figure 2 represents a schematically the evolution of equations on the GFA approach.

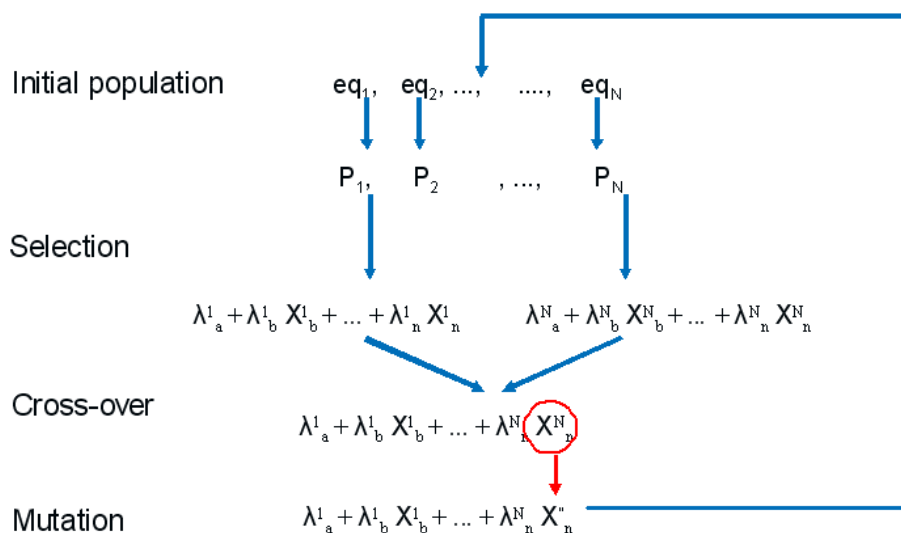

Figure 2: Schematic representation of equation evolution on the GFA approach.

Before carrying out calculations using the GFA approach, the total database was splitted into two data subsets:

The *training set* which represents 90% of the database. This is intended to build the predictive models, and is chosen to be representative of the solids and gases in the database;

The *test set* constituted from the remaining solid/gas couples of the database. There are viewed as external values and used to test the predictive power of the equations and to select the best predictive model. This Training/Test sets ratio used is commonly used in QSPR studies.<sup>[18],[19]</sup>

## 2 Simulation details

### 2.1 Simulation Methods:

The ESP fitting methodology has been applied by using the Jaguar<sup>[20]</sup> package: the B3LYP functional combined with the pseudo potential LanL2DZ for the transition metal and the double- $\zeta$  basis set 6 31G\*\* for the rest of the atoms was applied.

To design the isorecticular series and localise the crystallographic positions of each solids, periodic DFT optimisation were performed using VASP code<sup>[21]</sup>. Then the atomic positions were frozen, and the host-guest interaction energy grid was constructed before the MC simulation.

To compute fugacity simulations in the isobaric-isothermal ensemble (NPT) combined with the particle insertion method were performed<sup>22</sup> for pressure choose. Probabilities for MC bias move were set to 0.63 for rigid-body translations, 0.35 for rigid-body rotations (except for monoatomic gases such as Ar and CH<sub>4</sub>), and 0.02 for volume changes.



The complete list of force field parameters to describe the solid-gas interactions are listed in Tables C to G

**Tab. C: ESP partial charges for GME structures presented in Table B. The charges of the R-blm, b) charges of the nlm**

| <b>blm</b>           | <b>ZIF-Cl</b> | <b>ZIF-Br</b> | <b>ZIF-CH3</b> | <b>ZIF-NO2</b> | <b>ZIF-H</b> | <b>Moyenne</b> | <b>Variance</b> |
|----------------------|---------------|---------------|----------------|----------------|--------------|----------------|-----------------|
| <b>Zn</b>            | 1.07          | 1.04          | 1.08           | 1.02           | 1.095        | 1.0525         | 0.0008          |
| <b>N</b>             | -0.63         | -0.63         | -0.6           | -0.66          | -0.67        | -0.6300        | 0.0006          |
| <b>C<sub>1</sub></b> | 0.55          | 0.5           | 0.5            | 0.55           | 0.51         | 0.5250         | 0.0008          |
| <b>C<sub>2</sub></b> | 0.225         | 0.1           | 0.2            | 0.33           | 0.25         | 0.2138         | 0.0089          |
| <b>C<sub>3</sub></b> | -0.49         | -0.245        | -0.12          | -0.38          | -0.19        | -0.3088        | 0.0259          |
| <b>C<sub>4</sub></b> | -0.14         | -0.175        | -0.35          | -0.3           | -0.13        | -0.2413        | 0.0100          |
| <b>C<sub>5</sub></b> | 0.008         | 0.01          | 0.27           | 0.08           | -0.13        | 0.0920         | 0.0152          |
| <b>C<sub>6</sub></b> | -0.13         | -0.37         | -0.4           | -0.38          | -0.19        | -0.3200        | 0.0162          |
| <b>R</b>             | <b>ZIF-Cl</b> | <b>ZIF-Br</b> | <b>ZIF-CH3</b> | <b>ZIF-NO2</b> | <b>ZIF-H</b> | <b>Moyenne</b> | <b>Variance</b> |
| <b>Cl</b>            | -0.2          | -             | -              | -              | -            | -0.2           | -               |
| <b>Br</b>            | -             | -0.2          | -              | -              | -            | -0.2           | -               |
| <b>N</b>             | -             | -             | -              | 0.76           | -            | 0.76           | -               |
| <b>O</b>             | -             | -             | -              | -0.51          | -            | -0.51          | -               |
| <b>C</b>             | -             | -             | -0.15          | -              | -            | -              | -               |
| <b>H</b>             | -             | -             | 0.02           | -              | -            | -              | -               |

| <b>nlm</b> | <b>ZIF-Cl</b> | <b>ZIF-Br</b> | <b>ZIF-CH3</b> | <b>ZIF-NO2</b> | <b>ZIF-H</b> | <b>Moyenne</b> | <b>Variance</b> |
|------------|---------------|---------------|----------------|----------------|--------------|----------------|-----------------|
| <b>Zn</b>  | 1.07          | 1.04          | 1.08           | 1.02           | 1.095        | 1.0610         | 0.0009          |
| <b>N</b>   | -0.5          | -0.45         | -0.48          | -0.45          | -0.53        | -0.4820        | 0.0012          |
| <b>C1</b>  | 0.52          | 0.5           | 0.52           | 0.46           | 0.54         | 0.5080         | 0.0009          |
| <b>C2</b>  | -0.12         | -0.14         | -0.1           | -0.085         | -0.1         | -0.1090        | 0.0005          |
| <b>C3</b>  | -0.12         | -0.14         | -0.1           | -0.085         | -0.1         | -0.1090        | 0.0005          |
| <b>N</b>   | 0.62          | 0.62          | 0.6            | 0.66           | 0.6          | 0.6200         | 0.0006          |
| <b>O</b>   | -0.48         | -0.48         | -0.5           | -0.49          | -0.46        | -0.4820        | 0.0002          |

Tab. D: ESP partial charges for SOD structures presented in Table B.

| SOD       | ZIF-8                  | ZIF-COOH     | ZIF-90      | ZIF-NO <sub>2</sub>    | ZIF-Cl     | Moyenne | Variance |
|-----------|------------------------|--------------|-------------|------------------------|------------|---------|----------|
| <b>Zn</b> | 1.100                  | 0.900        | 0.850       | 0.792                  | 0.790      | 0.945   | 0.0117   |
| <b>N</b>  | -0.540                 | -0.290       | -0.310      | -0.120                 | -0.170     | -0.3875 | 0.0130   |
| <b>C1</b> | 0.640                  | 0.435        | 0.480       | 0.450                  | 0.470      | 0.5212  | 0.0077   |
| <b>C2</b> | -0.080                 | -0.150       | -0.200      | -0.300                 | -0.320     | -0.135  | 0.0027   |
| <b>H</b>  | 0.144                  | 0.133        | 0.173       | 0.172                  | 0.173      | 0.1541  | 0.0003   |
| <b>R</b>  | <b>-CH<sub>3</sub></b> | <b>-COOH</b> | <b>-HCO</b> | <b>-NO<sub>2</sub></b> | <b>-Cl</b> |         |          |
| <b>Cl</b> | -                      | -            | -           | -                      | -0.230     | -       | -        |
| <b>C</b>  | -0.670                 | 0.570        | 0.300       | -                      | -          | -       | -        |
| <b>O</b>  | -                      | -0.620       | -0.520      | -0.530                 | -          | -       | -        |
| <b>N</b>  | -                      | -            | -           | 0.710                  | -          | -       | -        |
| <b>H</b>  | 0.144                  | 0.400        | -0.030      | -                      | -          | -       | -        |

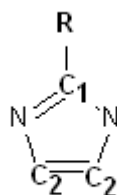

**SOD**

Tab. E: ESP partial charges for RHO structures presented in Table B.

| RHO                   | ZIF-71             | ZIF-93                | ZIF-96               | ZIF-97                                | Moyenne | Variance |
|-----------------------|--------------------|-----------------------|----------------------|---------------------------------------|---------|----------|
| Zn                    | 0.94               | 1.05                  | 1.18                 | 1.108                                 | 1.0695  | 0.0103   |
| N <sub>1</sub>        | -0.4               | -0.5                  | -0.56                | -0.34                                 | -0.4500 | 0.0097   |
| C <sub>1</sub>        | 0.51               | 0.32                  | 0.21                 | 0.31                                  | 0.3375  | 0.0157   |
| N <sub>2</sub>        | -0.4               | -0.5                  | -0.56                | -0.67                                 | -0.5325 | 0.0128   |
| C <sub>2</sub>        | 0.09               | 0.35                  | 0.305                | 0.49                                  | 0.3088  | 0.0275   |
| C <sub>3</sub>        | 0.09               | -0.1                  | -0.1                 | -0.36                                 | -0.1175 | 0.0342   |
| H <sub>1</sub>        | -0.06              | 0.055                 | 0.085                | 0.046                                 | 0.0315  | 0.0040   |
| R                     | (-Cl) <sub>2</sub> | -HCO/-CH <sub>3</sub> | -CN/-NH <sub>2</sub> | -CH <sub>3</sub> /-CH <sub>2</sub> OH |         |          |
| Cl                    | -0.15              | -                     | -0.92                | -                                     | -       | -        |
| H/C/O                 | -                  | -0.02/0.45/-0.56      | -                    | -                                     | -       | -        |
| C/H                   | -                  | -0.50/0.16            | -                    | -0.76/0.18                            | -       | -        |
| C/N                   | -                  | -                     | 0.39/-0.6            | -                                     | -       | -        |
| N/H                   | -                  | -                     | -0.7/0.35            | -                                     | -       | -        |
| C/H <sub>2</sub> /O/H | -                  | -                     | -                    | 0.52/0.18/-0.68/0                     | -       | -        |

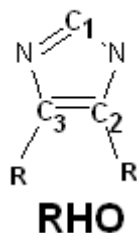

The vdW potential parameters for the force field used are summarized on Tab. F:

**Tab. F : vdW potential parameters for the elements used in this work**

| Non-bonded interactions |                      |                     |
|-------------------------|----------------------|---------------------|
| Atom Type               | $\epsilon(\text{K})$ | $\sigma(\text{nm})$ |
| Zn                      | 43.084               | 0.2338              |
| N                       | 23.974               | 0.3997              |
| O                       | 20.847               | 0.3118              |
| Cl                      | 78.872               | 0.3516              |
| C                       | 36.483               | 0.3259              |
| H                       | 15.288               | 0.2440              |

The gas models used during this work derive from several sources:

**Tab. G : List of force fields (FF) used in the QSPR analysis to represent the adsorbed gases**

| Molecule name      | Formula                       | Polar nature           | $T_b$ [K] | Type of FF/family                         | Ref.              |
|--------------------|-------------------------------|------------------------|-----------|-------------------------------------------|-------------------|
| Argon              | Ar                            | non polar              | 87.3      | All atoms                                 | [ <sup>23</sup> ] |
| Methane            | CH <sub>4</sub>               | non polar              | 111.6     | United atom                               | [ <sup>24</sup> ] |
| Ethane             | C <sub>2</sub> H <sub>6</sub> | non polar <sup>a</sup> | 184.5     | Anisotropic United Atom (AUA4)            | [ <sup>25</sup> ] |
| Molecular nitrogen | N <sub>2</sub>                | quadrupolar            | 77.9      | All atoms                                 | [ <sup>26</sup> ] |
| Molecular oxygen   | O <sub>2</sub>                | quadrupolar            | 90.0      | All atoms                                 | [ <sup>27</sup> ] |
| Carbon dioxide     | CO <sub>2</sub>               | quadrupolar            | 186.5     | All atoms (EMP2)                          | [ <sup>28</sup> ] |
| Carbon monoxide    | CO                            | dipolar                | 77.9      | All atoms                                 | [ <sup>29</sup> ] |
| Sulfur dioxide     | SO <sub>2</sub>               | dipolar/quadrupolar    | 263.0     | All atoms                                 | [ <sup>30</sup> ] |
| Hydrogen sulfide   | H <sub>2</sub> S              | dipolar/quadrupolar    | 211.0     | All atoms                                 | [ <sup>31</sup> ] |
| Aceto-nitrile      | CH <sub>3</sub> CN            | dipolar                | 383.0     | Hybrid (united atom for CH <sub>3</sub> ) | [ <sup>32</sup> ] |
| Water              | H <sub>2</sub> O              | dipolar/quadrupolar    | 263.0     | Hybrid TIP4P                              | [ <sup>33</sup> ] |

## 2.2 Adsorption simulation details

To model the gas adsorption at low coverage, Grand Canonical Monte Carlo (GCMC) simulations combined with a bias scheme for the insertion of the centre of mass of the guest molecules were performed with the Gibbs Code v.8.3<sup>[34]</sup>. The probabilities bias moves<sup>[35]</sup> were used with arbitrary proportion: 0.35 for the rigid-body translation, 0.10 for rigid-body rotations (except for monoatomic gases such as Ar or CH<sub>4</sub>), and 0.55 for the insertions or deletions.

All simulations were performed in a simulation box incorporating 2x2x2 unit cells. LJ interactions and real-space electrostatic contributions were calculated by using a cut off radius of ~17Å. No LJ tail corrections were considered<sup>[36]</sup>, but standard long-range electrostatic interactions were calculated by using the Ewald methodology with ten vectors on the reciprocal space and a screening factor  $\alpha$  of 2.5.

## 2.3 Volumes and surfaces

The free volume was computed by using the volume integral in Eq. 7 in which is the LJ interaction between a single helium atom is ( $\epsilon_{\text{He}}=10.22$  K ;  $\sigma_{\text{He}}=0.258$  nm) and the complete structure of the adsorbent:

$$\text{Eq. 7} \quad V_{\text{free}} = \int \exp(-U_{\text{ads}}^{\text{He}}(r) / k_b T) dr$$

The porosity  $\Phi$  is simply the ratio between the free volume ( $V_{\text{free}}$ ) with respect to the total unit cell volume ( $V_{\text{uc}}$ ) (Eq. 8):

$$\text{Eq. 8} \quad \phi = \frac{V_{\text{free}}}{V_{\text{uc}}}$$

The accessible surface area was computed from Monte Carlo integration technique using a "probe" molecule which is rolled along the surface of the solid. Then the surface area is obtained from the ratio of the probe molecules that did not overlap with other framework atoms to the total number of attempts.

## 2.4 Isotheric heat of adsorption computation

Isotheric heats of adsorption  $q_{st}$  were calculated from Eq. 9<sup>[37]</sup> in which  $H_b$  is the enthalpy of the bulk phase and  $U_a$  is the energy of the adsorbed phase.

$$\text{Eq. 9} \quad q_{st} = H_b - \left[ \frac{\partial U_a}{\partial N} \right]_{T,V}$$

By using a fluctuations method with ideal gas assumptions under Henry's regime, the isotheric heats can be readily calculated from GCMC simulation according to Eq. 10, in which  $U_{ext}^s$  is the intermolecular energy of the adsorbed phase and  $N$  is the number of adsorbed molecules. The angle brackets denote averages in the grand canonical ensemble.

$$\text{Eq. 10} \quad q_{st} = RT - \frac{\langle U_{ext}^s N \rangle - \langle U_{ext}^s \rangle \langle N \rangle}{\langle N^2 \rangle - \langle N \rangle^2}$$

Experimentally, the isotheric heat of adsorption at low coverage can be estimated by means of the Van't Hoff equation (Eq. 11):

$$\text{Eq. 11} \quad \left[ \frac{d \ln P}{dT} \right]_N = \frac{\Delta H_0}{RT^2},$$

A series of adsorptions isotherms at different temperatures are required. Then at constant coverage, the pressure is derivate as a function of the temperature as presented in Eq. 11.

### 3 Results:

#### 3.1 Analysis of the $q_{st}$ simulation results in function of the different descriptors

Therefore a series of analysis are proposed, where  $q_{st}^{\circ}$  is studied as a function of variations in the magnitude of a single descriptor. As an example the two descriptors proposed are the organic linker dipolar moment  $|\vec{\mu}_{OL}|$  and the gas atmospheric boiling temperature  $T_b$ .

##### 3.1.1 Variation of $q_{st}$ with $|\vec{\mu}_{OL}|$

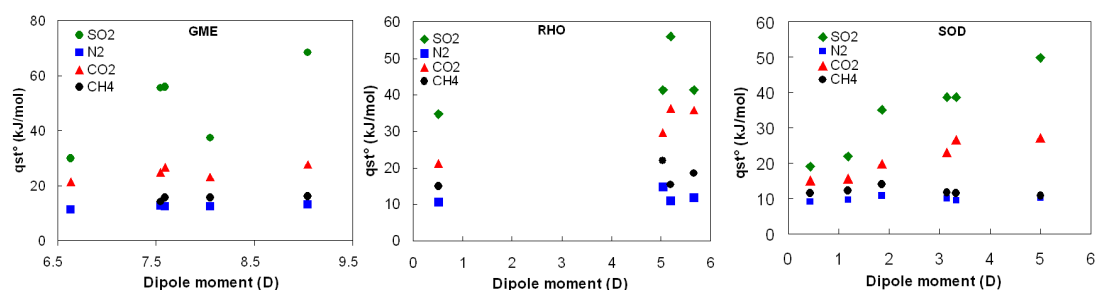

**Figure 3 :** Variation of the isosteric heat of adsorption for some selected gases as function of  $|\vec{\mu}_{OL}|$  for the three topologies studied.

In Figure 3, we studied the variation of the isosteric heat of adsorption as a function of  $|\vec{\mu}_{OL}|$ . Each topology was treated separately and we choose to present only the main representative gases owing different polarities. The influence of the linkers dipolar moment  $|\vec{\mu}_{OL}|$  is not the same for the different gases. As expected for non polar gas, such as CH<sub>4</sub>, the dipolar moment does not impact on the  $q_{st}^{\circ}$ . For polar gases, the higher the linker  $|\vec{\mu}_{OL}|$ , the higher will be the  $q_{st}^{\circ}$ . Moreover, the analysis reveals that the degree of polarity of the gas is important. For example, gases having weak quadrupolar moment (polarity), such as N<sub>2</sub>, are less influenced by solids having highly polar linkers than CO<sub>2</sub> or SO<sub>2</sub> (which possess high



quadrupole and dipole moment respectively). The higher the gas polarity, the higher will be the increase of  $q_{st}^{\circ}$  when we increase  $|\bar{\mu}_{OL}|$ . We can note that this tendency is strongest for dipolar gases than for quadrupolar ones.

### 3.1.2 Variation of $q_{st}$ with $T_b$

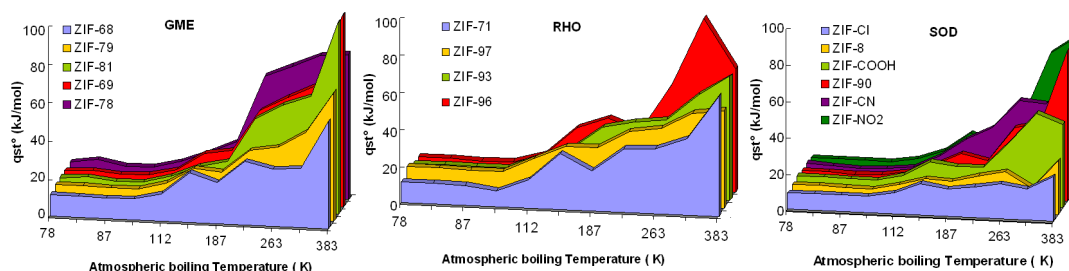

**Figure 4: Variation of the isosteric heat of adsorption of all gases studied as function of  $T_b$  and the three topologies studied.**

The evolution of  $q_{st}^{\circ}$  as function of  $T_b$  for all gases was investigated in Figure 4. Each topology was also treated separately for the same reasons explained above. According to the results, the higher the  $T_b$ , the higher will be  $q_{st}^{\circ}$ . The value of  $T_b$  is correlated with the cohesive energy intrinsic to the gas molecules. We can extend this intrinsic cohesive energy to the surface-gas energy. Thus, the higher the intrinsic cohesive energy, the higher the surface-gas and then, the higher  $q_{st}^{\circ}$  will be. As expected the influence of  $T_b$  influence seems independent to the solid topology.

### 3.1.3 Variation of $q_{st}$ with $H$

Similar analyses for other descriptors are complicated due to the difficulty in isolating their effect over  $q_{st}^\circ$ . We compared different topologies having different pores sizes, but also having different organic linker with different chemical nature (different  $n_{fg}$ ). It is interesting to notice that with some rare exceptions (RHO ZIF-93<sup>[5]</sup> and SOD SIM-1 have **almeIm** linker<sup>[1]</sup>, it is difficult to obtain two different framework topologies with the same organic linkers. However, one may expect that materials with narrow pores would increase the confinement effect (this is the case for dealluminated zeolites, where the surface chemistry is composed exclusively by Si and O).<sup>[13]</sup>

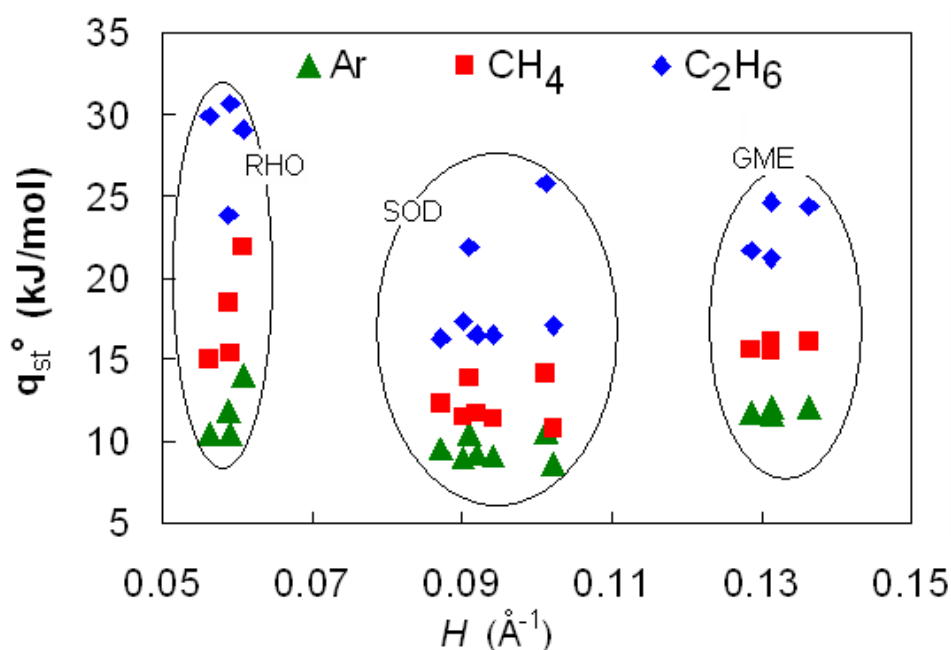

Figure 5: Variation of the isosteric heat of adsorption as function of the mean curvature  $H$  for non polar gas. The topology corresponding to the pore curvature points have been indicated.

The variation of  $q_{st}^\circ$  with the mean curvature can be observed in Figure 5. We selected non polar gases to avoid the solid-gas electrostatic interactions. The variation of the isosteric

heat is not monotone. The solid topology and the chemical nature of the organic linkers affect the results obtained. Indeed the mean curvature are grouped by topology, the smaller values of the  $H$  are obtained for the RHO, followed by the SOD and finally by the GME structures. The  $q_{st}^{\circ}$  tends to decrease between  $H$  values corresponding to RHO and SOD solids, and increase between the SOD-GME  $H$  values. In addition, it is important to notice that solids with RHO topologies have bi-substituted organic linkers ( $n_{fg} = 2$ ), while SOD and GME possess linkers with only one functional group ( $n_{fg} = 1$ ). It is possible that although having the biggest pore diameters (low  $H$  values), the RHO solids have strongest vdW interactions than the other two solids due to the additional functional group. This example reveals the limit of descriptor  $H$  to appropriately characterize the vdW interactions of the different solids compared in this study.

### 3.2 Analysis of the QSPR model for $q_{st}$

It is important to keep in mind that the QSPR method used in our analysis (GFA) impose a linear relation between descriptors (Eq. 4). However, it is possible to introduce some degree of non linear behavior by considering mathematical transformations of the descriptors used in the database (by taking the inverse, the natural logarithm or the exponential of the magnitudes). In Table H we summarized the response of the target properties (increase or decrease) when a single descriptor is increased or decreased while keeping constant the other ones.

After taking into account the expected trends shown in Eq. 4, the most appropriate equation obtained with the GFA procedure describing  $q_{st}^{\circ}$  is shown below,

$$\text{Eq. 12 } q_{st}^{\circ} = \lambda_0 + (\lambda_1 |Q_{OL}| + \lambda_2 [n_{fg} \cdot H])_s + (\lambda_3 \ln(T_b))_g + (\lambda_4 H \cdot \|\vec{\mu}_{OL}\| \cdot |\vec{\mu}_g|)_{s/g},$$

**Tab. H . Expected response of the target property ( $q_{st}^0$ ) to an increase or decrease of individual descriptors. Increments and decrements are represented by (↑) and (↓) arrows, respectively.**

| Descriptor         | Sense of variation | Expected response for $q_{st}^0$ |
|--------------------|--------------------|----------------------------------|
| $ \vec{\mu}_{OL} $ | ↑                  | ↑                                |
|                    | ↓                  | ↓                                |
| $ Q_{OL} $         | ↑                  | ↑                                |
|                    | ↓                  | ↓                                |
| $ \vec{\mu}_g $    | ↑                  | ↑                                |
|                    | ↓                  | ↓                                |
| $T_b$              | ↑                  | ↑                                |
|                    | ↓                  | ↓                                |
| $n_{fg}$           | ↑                  | ↑                                |
|                    | ↓                  | ↓                                |
| $K$ or $H$         | ↑                  | ↑                                |
|                    | ↓                  | ↓                                |

with  $H$  the mean curvature,  $n_{fg}$  the number of functional groups per organic linker,  $|\vec{\mu}_{OL}|$  and  $|\vec{\mu}_g|$  are the organic linker and gas molecular dipolar moment respectively,  $|Q_{OL}|$  is the module of the quadrupolar matrix of the organic linker and  $\ln(T_b)$  is the natural logarithm of the atmospheric boiling temperature of the adsorbed gas. We can classify the selected descriptors according to three type of interactions, i.e.: solid, gas and solid/gas. The different coefficient  $\lambda_i$  obtained for the correlation is reported in Table I. Four solids descriptors were taken into account : the polar nature of the solid (represented by  $Q_{OL}$  and  $\mu_{OL}$ ), the van der Waals interaction of the solid represented by the degree of confinement ( $H$  and  $n_{fg}$ ).

**Tab. I Constants ( $\lambda_i$ ) obtained in the QSPR approach for the prediction of the isosteric heat of adsorption ( $q_{st}^0$ ) as described with Eq. 12. The dipolar moment are expressed in Debye (D).**

|             | <b>Coefficients</b> | <b>Units</b>                                             |
|-------------|---------------------|----------------------------------------------------------|
| $\lambda_0$ | - 97.2651           | <i>kJ mol<sup>-1</sup></i>                               |
| $\lambda_1$ | 0.52011             | <i>kJ mol<sup>-1</sup> D<sup>-1</sup> Å<sup>-1</sup></i> |
| $\lambda_2$ | 95.8506             | <i>kJ mol<sup>-1</sup> Å</i>                             |
| $\lambda_3$ | 20.1537             | <i>kJ mol<sup>-1</sup> K<sup>-1</sup></i>                |
| $\lambda_4$ | 9.6137              | <i>kJ mol<sup>-1</sup> D<sup>-2</sup> Å</i>              |

The adsorbed gas is represented by  $\mu_g$  and  $T_b$ , which are respectively a measure of its polar nature and its cohesive energy, i.e. the higher of  $\mu_g$  or  $T_b$ , the stronger will be the gas-gas interactions. The Eq. 12 agrees with the expectations formulated in Table H.

The error obtained to reproduce the  $q_{st}^0$  simulated values over the *test* and the *training* sets are presented in Table J.

**Tab. J Mean Absolute Error (MAE) as well as the Mean Absolute Percentage Error (MAPE) obtained with Eq. 12 for the training and test sets.**

| <i>Set</i>      | <b>MAE</b> | <b>MAPE(%)</b> |
|-----------------|------------|----------------|
| <i>Test</i>     | 6.7        | 23.8           |
| <i>Training</i> | 5.6        | 24.6           |

The results obtained using Eq. 12 are encouraging. The predicted results agree fairly well with simulated data for both the test and training set. The predictive power of this equation is hence interesting.

The data set can also be divided as a function of the gases polarity. The comparison between the simulation results and the QSPR correlation as a function of the polar nature of gas is illustrated in Figure 6. Its predictive accuracy is analyzed in Table K.

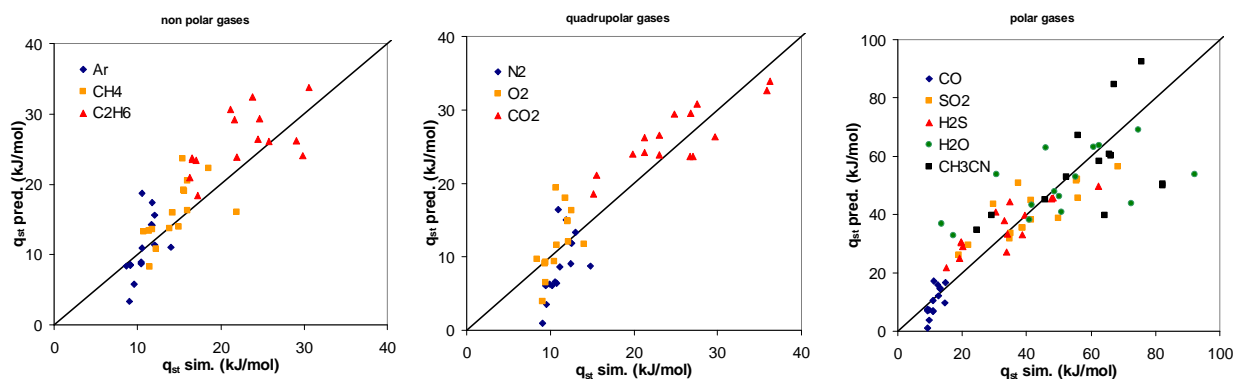

Figure 6 : Comparison of the simulated isosteric heat of adsorption of different gases on different solids with prediction issued by the QSPR model as function of the gas polar nature.

Tab. K . Mean Absolute Error (MAE) as well as the Mean Absolute Percentage Error (MAPE) obtained with Eq. 12 for the different gases studied. The electrostatic nature of each gas is classified according to: non polar (np), quadrupolar (Q) and dipolar ( $\mu_g$ )

| <i>Gas</i>                    | (polar nature)                | MAE  | MAPE (%) |
|-------------------------------|-------------------------------|------|----------|
| Ar                            | np                            | 2.7  | 25.2     |
| CH <sub>4</sub>               | np                            | 2.9  | 19.5     |
| C <sub>2</sub> H <sub>6</sub> | np                            | 4.8  | 23.4     |
| O <sub>2</sub>                | Q (0.99 D.Å)                  | 2.6  | 23.8     |
| N <sub>2</sub>                | Q (1.80 D.Å)                  | 3.7  | 34.8     |
| CO <sub>2</sub>               | Q (5.06 D.Å)                  | 3.4  | 15.1     |
| CO                            | $\mu_g$ (0.03 D)/Q (0.06 D.Å) | 3.3  | 30.3     |
| H <sub>2</sub> S              | $\mu_g$ (1.43 D)/Q (2.50 D.Å) | 6.5  | 23.8     |
| SO <sub>2</sub>               | $\mu_g$ (1.63 D)/Q (7.19 D.Å) | 6.7  | 18.3     |
| H <sub>2</sub> O              | $\mu_g$ (2.18 D)/Q (3.04 D.Å) | 11.7 | 34.0     |
| CH <sub>3</sub> CN            | $\mu_g$ (4.12 D)/Q (1.19 D.Å) | 13.8 | 21.6     |

It is not straight forward to discriminate which kind of fluid (non polar, quadrupolar or polar) is better (or worst) described by the model. It seems that there is no particular

correlation between polar nature of the gases and the obtained deviation. We can notice however that the lowest MAPE deviations are for CO<sub>2</sub> and CH<sub>4</sub> and the highest for H<sub>2</sub>O and N<sub>2</sub>. We can observe the following order from lowest to highest MAPE,

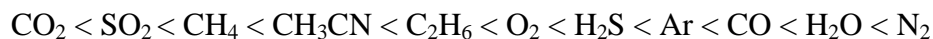

The main deviations obtained in function of the solid topology is presented in Table L. Our analysis reveals that the QSPR model for  $q_{st}^\circ$  is slightly more accurate for the family of solids with GME topology (17.8%), followed by the RHO (23.5%) and SOD (33.1%) topologies respectively. The main difference between families (excepting the evident crystallographic topology) is the degree of confinement and the type of organic linker. GME has two types of linkers, the nIm is common to all solids and it is exposed in the small channel and, substituted bIm which are distributed in the large cavities. The GME have the smallest pores of the three solids studied as illustrated in the Figure 5. The RHO family has the largest pores but every organic linker possess two functional groups in positions -4 and -5 instead of one for the other two families. Finally the SOD family have pores sizes ranging in between of those GME and RHO and have an unique type of functionalized Im linker in position -2. It is extremely difficult to find a physical explanation that relates the observed tendency of the QSPR model with any structural difference between the solids studied here

**Tab. L . Mean Absolute Error (MAE) as well as the Mean Absolute Percentage Error (MAPE in %) obtained with Eq. 12 for the different solids studied for all gases studied.**

| <i>Solid</i> <sup>a</sup>             | MAE        | MAPE(%)     |
|---------------------------------------|------------|-------------|
| ZIF-68                                | 5.8        | 21.0        |
| ZIF-69 (Cl)                           | 4.0        | 13.4        |
| ZIF-78 (NO <sub>2</sub> )             | 6.7        | 20.4        |
| ZIF-79 (CH <sub>3</sub> )             | 6.2        | 17.2        |
| ZIF-81 (Br)                           | 4.6        | 16.8        |
| <b>Average GME</b>                    | <b>5.4</b> | <b>17.8</b> |
| ZIF-8 (CH <sub>3</sub> )              | 7.1        | 49.3        |
| ZIF-90 (OH-CH <sub>3</sub> )          | 5.9        | 21.8        |
| ZIF-(Cl)                              | 6.6        | 50.1        |
| ZIF-(COOH) <sup>(b)</sup>             | 3.5        | 18.5        |
| ZIF-(NO <sub>2</sub> ) <sup>(b)</sup> | 8.4        | 25.6        |
| <b>Average SOD</b>                    | <b>6.3</b> | <b>33.1</b> |
| ZIF-71 (Cl <sub>2</sub> )             | 5.2        | 19.8        |
| ZIF-93 (CO-CH <sub>3</sub> )          | 4.2        | 22.2        |
| ZIF-96 (CN-NH <sub>2</sub> )          | 9.2        | 34.4        |
| ZIF-97 (CH <sub>3</sub> -OH)          | 3.8        | 17.4        |
| <b>Average RHO</b>                    | <b>5.6</b> | <b>23.5</b> |

<sup>(a)</sup>chemical functionalization is included for clarity, <sup>(b)</sup> virtual solids.

It is important to mention that, if the QSPR method is only fed with CO<sub>2</sub> and the SOD family of solids, a simple correlation is obtained between the exponential of dipolar moment of the solid ( $\mu_{OL}$ ) and  $q_{st}^0$ , such as the behaviour observed in our previous work.<sup>15</sup> If the analysis is extended to CO<sub>2</sub> and CH<sub>4</sub> adsorbed over the complete list of solids, a more complex equation is obtained,



**Eq. 13** 
$$\ln(q_{st}^{\circ} \cdot H) = 0.08|\mu_{OL}| - 0.035H^{-1} + 0.019Mw_g + 0.001,$$

Where  $Mw_g$  is the molecular weight of the gas. In this case  $q_{st}^{\circ}$  is predicted with an  $R^2$  about 0.9 and MAE of about 10.7%. As usual, any physical interpretation of the obtained equation is complicated. The important point to keep in mind is the large variation in the form of the resulting equation as a function of the size of the database used. The difference between Eq. 12 and Eq. 13 clearly illustrates this idea.

In the last part of this section we analyse the evolution observed between a couple of descriptors, while keeping the rest of descriptors constant. In Figure 7 we observe the variation of the  $q_{st}^{\circ}$  as function of the solid and gas dipolar moment. To better illustrate this idea, we have considered a factious solid with pore diameter of 8 Å and with linker quadrupole moment  $|Q_{OL}|$  equal to 28 D Å. The gas is assumed to have a high boiling temperature of 383 K. The highest  $q_{st}^{\circ}$  values are obtained for the combination of both highest values of the organic linker dipolar moment ( $\mu_{OL}$ ) and gas dipolar moment ( $\mu_g$ ). The  $q_{st}^{\circ}$  value is correlated to both gas and solids dipolar moment intensity. The  $q_{st}^{\circ}$  value could also be restricted by one of this dipolar moment intensity. Indeed if one of these descriptors is weak, the  $q_{st}^{\circ}$  value increases slowly until a limit value even if the other descriptor reaches high values. This phenomenon is illustrated by the vertical and horizontal asymptote delimiting the border between two ranges of  $q_{st}^{\circ}$  values at the extreme of dipolar value.

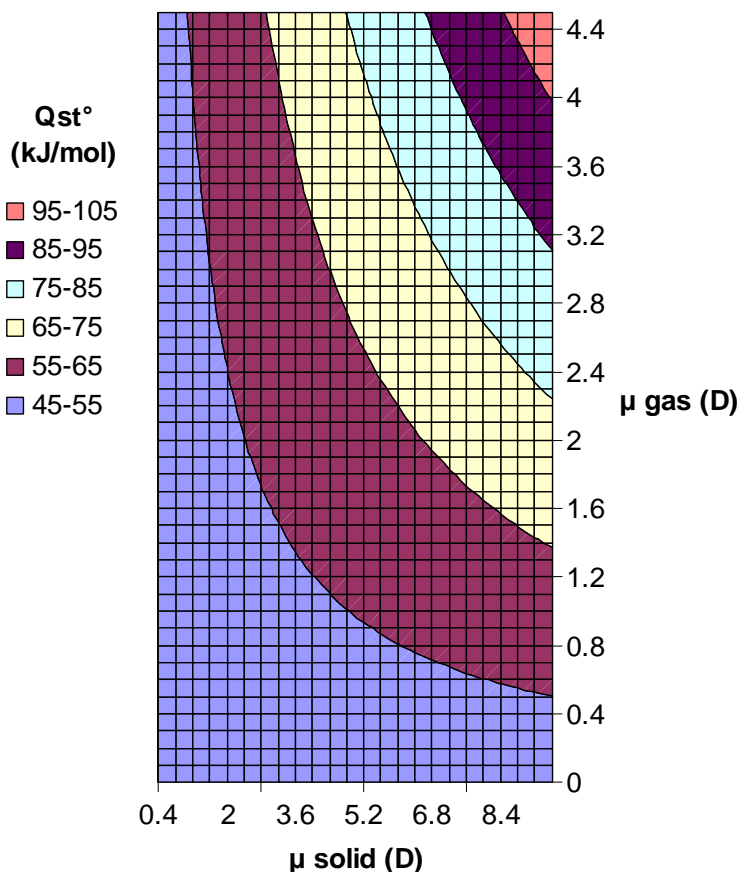

Figure 7. Variation of  $q_{st}^{\circ}$  with the organic linker dipolar moment ( $\mu_{OL}$ ) and gas dipolar moment ( $\mu_g$ ). In this example we have considered a solid with pore diameter of 8 Å and  $|Q_S|$  of 28 D.Å together with a gas having a high boiling temperature of 383 K.

The isosteric heat of adsorption is directly related to the separation and storage ability of a solid. Thus the selectivity between gases with different dipolar moment could be strongly enhanced using solid with high dipolar moment. Nevertheless, the choice of one material for PSA application should be done carefully, because too high value of  $q_{st}^{\circ}$  will strongly impact on the desorption phase cost.

### 3.3 Correlative equation using Artificial Neural Network (ANN)

The comparison between the simulation results and the ANN for the isosteric heat of adsorption at zero coverage can be observed in Figure 8. The accuracy of the ANN model can be analyzed from the deviation obtained in reproducing the simulated  $q_{st}^{\circ}$  values. The mean absolute error (MAE) and the MAPE are used to quantify the errors between predicted and simulated values. The lower MAE and MAPE, the better are the predictions. The predicted results agree fairly well with simulated data for both the test and training set ( $R^2$  of 0.891, MAE about 3.4 kJ/mol and 5.6 kJ/mol and a MAPE about 13.7 % and 12.3 % for the test and the training set). The ANN model is more accurate than the correlation given in Eq. 12, the problem is that this approach do not provide a useful working equation.

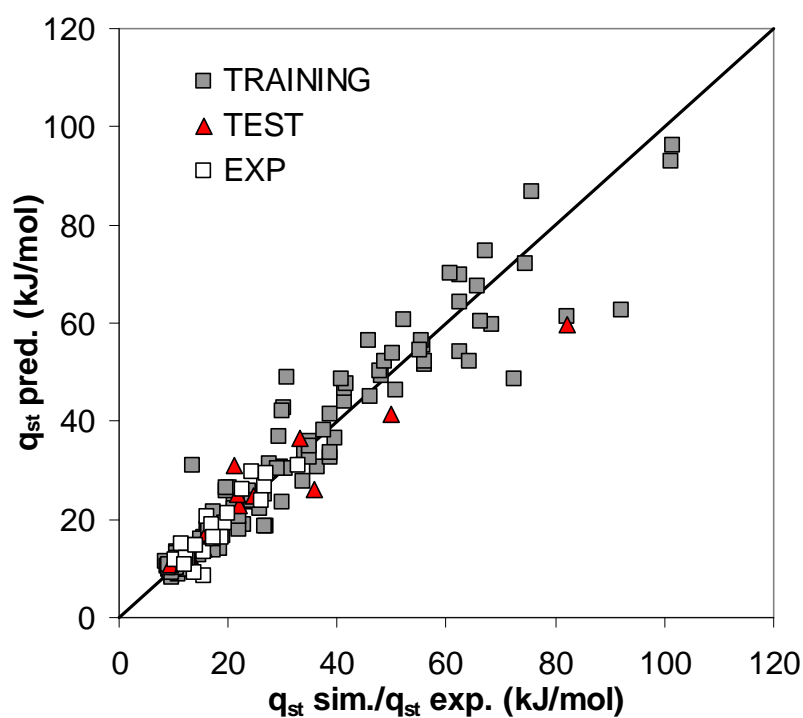

Figure 8. Comparison of the simulated and experimental isosteric heat of adsorption of different gases on different solids with prediction obtained using the ANN model. Both sets of training and test are shown for consistency

**Database :**

| Solid           | Topology | Set type | Gas                           | Qst sim (kJ/mol) | Qst pred (eq 11) (kJ/mol) |
|-----------------|----------|----------|-------------------------------|------------------|---------------------------|
| ZIF-93 (OH-CH3) | RHO      | TEST     | CO <sub>2</sub>               | 35.910000        | 32.6350882                |
| ZIF-71 (Cl2)    | RHO      | TEST     | CH <sub>4</sub>               | 14.990000        | 13.9096125                |
| ZIF-96 (CN-NH2) | RHO      | TEST     | CH <sub>4</sub>               | 15.420000        | 23.6340357                |
| ZIF-69(Cl)      | GME      | TEST     | CH <sub>4</sub>               | 15.530000        | 19.2127878                |
| ZIF-CN          | SOD      | TEST     | CO                            | 9.271000         | 7.48338923                |
| ZIF-81(Br)      | GME      | TEST     | CO                            | 13.180000        | 14.5362226                |
| ZIF-78(NO2)     | GME      | TEST     | N <sub>2</sub>                | 12.990000        | 13.2837375                |
| ZIF-81(Br)      | GME      | TEST     | Ar                            | 11.720000        | 14.0958139                |
| ZIF-68          | GME      | TEST     | H <sub>2</sub> S              | 33.100000        | 38.012356                 |
| ZIF-8           | SOD      | TEST     | SO <sub>2</sub>               | 21.880000        | 29.6858815                |
| ZIF-CN          | SOD      | TEST     | SO <sub>2</sub>               | 49.790000        | 38.5862076                |
| ZIF-90          | SOD      | TEST     | CH <sub>3</sub> CN            | 82.220000        | 49.8982612                |
| ZIF-69(Cl)      | GME      | TEST     | C <sub>2</sub> H <sub>6</sub> | 24.630000        | 29.3501103                |
| ZIF-78(NO2)     | GME      | TEST     | C <sub>2</sub> H <sub>6</sub> | 21.170000        | 30.6764002                |
| ZIF-81(Br)      | GME      | TEST     | C <sub>2</sub> H <sub>6</sub> | 21.610000        | 29.1909523                |
| ZIF-8           | SOD      | TRAINING | CO <sub>2</sub>               | 15.580000        | 21.1196764                |
| ZIF-90          | SOD      | TRAINING | CO <sub>2</sub>               | 23.010000        | 23.9088807                |
| ZIF-CN          | SOD      | TRAINING | CO <sub>2</sub>               | 27.110000        | 23.6269241                |
| ZIF-COOH        | SOD      | TRAINING | CO <sub>2</sub>               | 19.870000        | 24.0131402                |
| ZIF-NO2         | SOD      | TRAINING | CO <sub>2</sub>               | 26.670000        | 23.7118793                |
| ZIF-Cl          | SOD      | TRAINING | CO <sub>2</sub>               | 15.140000        | 18.585827                 |
| ZIF-71 (Cl2)    | RHO      | TRAINING | CO <sub>2</sub>               | 21.250000        | 24.2484722                |
| ZIF-96 (CN-NH2) | RHO      | TRAINING | CO <sub>2</sub>               | 36.260000        | 33.9728955                |
| ZIF-97 (CH2-OH) | RHO      | TRAINING | CO <sub>2</sub>               | 29.670000        | 26.3506334                |
| ZIF-68          | GME      | TRAINING | CO <sub>2</sub>               | 21.250000        | 26.2208784                |
| ZIF-69(Cl)      | GME      | TRAINING | CO <sub>2</sub>               | 26.750000        | 29.5516476                |
| ZIF-78(NO2)     | GME      | TRAINING | CO <sub>2</sub>               | 27.570000        | 30.8779375                |
| ZIF-79(CH3)     | GME      | TRAINING | CO <sub>2</sub>               | 23.090000        | 26.6093701                |
| ZIF-81(Br)      | GME      | TRAINING | CO <sub>2</sub>               | 24.850000        | 29.3924895                |
| ZIF-8           | SOD      | TRAINING | CH <sub>4</sub>               | 12.280000        | 10.7808166                |
| ZIF-90          | SOD      | TRAINING | CH <sub>4</sub>               | 11.760000        | 13.5700209                |
| ZIF-CN          | SOD      | TRAINING | CH <sub>4</sub>               | 10.770000        | 13.2880643                |
| ZIF-COOH        | SOD      | TRAINING | CH <sub>4</sub>               | 13.870000        | 13.6742804                |
| ZIF-NO2         | SOD      | TRAINING | CH <sub>4</sub>               | 11.430000        | 13.3730195                |
| ZIF-Cl          | SOD      | TRAINING | CH <sub>4</sub>               | 11.450000        | 8.24696725                |
| ZIF-93 (OH-CH3) | RHO      | TRAINING | CH <sub>4</sub>               | 18.510000        | 22.2962284                |
| ZIF-97 (CH2-OH) | RHO      | TRAINING | CH <sub>4</sub>               | 21.890000        | 16.0117737                |
| ZIF-68          | GME      | TRAINING | CH <sub>4</sub>               | 14.180000        | 15.8820186                |
| ZIF-78(NO2)     | GME      | TRAINING | CH <sub>4</sub>               | 16.030000        | 20.5390777                |
| ZIF-79(CH3)     | GME      | TRAINING | CH <sub>4</sub>               | 16.030000        | 16.2705103                |
| ZIF-81(Br)      | GME      | TRAINING | CH <sub>4</sub>               | 15.630000        | 19.0536297                |

|                              |     |          |                |           |            |
|------------------------------|-----|----------|----------------|-----------|------------|
| ZIF-8                        | SOD | TRAINING | CO             | 9.772000  | 3.83375125 |
| ZIF-90                       | SOD | TRAINING | CO             | 9.622000  | 7.14574598 |
| ZIF-COOH                     | SOD | TRAINING | CO             | 10.970000 | 6.91054738 |
| ZIF-NO2                      | SOD | TRAINING | CO             | 9.200000  | 7.0169053  |
| ZIF-Cl                       | SOD | TRAINING | CO             | 9.173000  | 1.12281845 |
| ZIF-71 (Cl <sub>2</sub> )    | RHO | TRAINING | CO             | 10.850000 | 6.75572862 |
| ZIF-93 (OH-CH <sub>3</sub> ) | RHO | TRAINING | CO             | 12.310000 | 15.991355  |
| ZIF-96 (CN-NH <sub>2</sub> ) | RHO | TRAINING | CO             | 11.140000 | 17.2569638 |
| ZIF-97 (CH <sub>2</sub> -OH) | RHO | TRAINING | CO             | 14.570000 | 9.63249058 |
| ZIF-68                       | GME | TRAINING | CO             | 11.030000 | 10.523417  |
| ZIF-69(Cl)                   | GME | TRAINING | CO             | 13.080000 | 14.7684444 |
| ZIF-78(NO <sub>2</sub> )     | GME | TRAINING | CO             | 14.910000 | 16.6302147 |
| ZIF-79(CH <sub>3</sub> )     | GME | TRAINING | CO             | 12.660000 | 12.1068856 |
| ZIF-8                        | SOD | TRAINING | N <sub>2</sub> | 9.580000  | 3.52547639 |
| ZIF-90                       | SOD | TRAINING | N <sub>2</sub> | 9.945000  | 6.31468074 |
| ZIF-CN                       | SOD | TRAINING | N <sub>2</sub> | 10.240000 | 6.03272414 |
| ZIF-COOH                     | SOD | TRAINING | N <sub>2</sub> | 10.800000 | 6.41894017 |
| ZIF-NO2                      | SOD | TRAINING | N <sub>2</sub> | 9.507000  | 6.11767927 |
| ZIF-Cl                       | SOD | TRAINING | N <sub>2</sub> | 9.043000  | 0.99162705 |
| ZIF-71 (Cl <sub>2</sub> )    | RHO | TRAINING | N <sub>2</sub> | 10.610000 | 6.65427225 |
| ZIF-93 (OH-CH <sub>3</sub> ) | RHO | TRAINING | N <sub>2</sub> | 11.860000 | 15.0408882 |
| ZIF-96 (CN-NH <sub>2</sub> ) | RHO | TRAINING | N <sub>2</sub> | 11.000000 | 16.3786955 |
| ZIF-97 (CH <sub>2</sub> -OH) | RHO | TRAINING | N <sub>2</sub> | 14.800000 | 8.75643345 |
| ZIF-68                       | GME | TRAINING | N <sub>2</sub> | 11.110000 | 8.62667844 |
| ZIF-69(Cl)                   | GME | TRAINING | N <sub>2</sub> | 12.480000 | 11.9574476 |
| ZIF-79(CH <sub>3</sub> )     | GME | TRAINING | N <sub>2</sub> | 12.420000 | 9.01517013 |
| ZIF-81(Br)                   | GME | TRAINING | N <sub>2</sub> | 12.510000 | 11.7982895 |
| ZIF-8                        | SOD | TRAINING | O <sub>2</sub> | 9.508000  | 6.52838108 |
| ZIF-90                       | SOD | TRAINING | O <sub>2</sub> | 9.484000  | 9.31758544 |
| ZIF-CN                       | SOD | TRAINING | O <sub>2</sub> | 9.337000  | 9.03562883 |
| ZIF-COOH                     | SOD | TRAINING | O <sub>2</sub> | 10.530000 | 9.42184487 |
| ZIF-NO2                      | SOD | TRAINING | O <sub>2</sub> | 9.326000  | 9.12058396 |
| ZIF-Cl                       | SOD | TRAINING | O <sub>2</sub> | 9.058000  | 3.99453175 |
| ZIF-71 (Cl <sub>2</sub> )    | RHO | TRAINING | O <sub>2</sub> | 8.419000  | 9.65717694 |
| ZIF-93 (OH-CH <sub>3</sub> ) | RHO | TRAINING | O <sub>2</sub> | 11.790000 | 18.0437929 |
| ZIF-96 (CN-NH <sub>2</sub> ) | RHO | TRAINING | O <sub>2</sub> | 10.650000 | 19.3816002 |
| ZIF-97 (CH <sub>2</sub> -OH) | RHO | TRAINING | O <sub>2</sub> | 14.090000 | 11.7593382 |
| ZIF-68                       | GME | TRAINING | O <sub>2</sub> | 10.780000 | 11.6295831 |
| ZIF-69(Cl)                   | GME | TRAINING | O <sub>2</sub> | 12.070000 | 14.9603523 |
| ZIF-78(NO <sub>2</sub> )     | GME | TRAINING | O <sub>2</sub> | 12.510000 | 16.2866422 |
| ZIF-79(CH <sub>3</sub> )     | GME | TRAINING | O <sub>2</sub> | 12.200000 | 12.0180748 |
| ZIF-81(Br)                   | GME | TRAINING | O <sub>2</sub> | 12.110000 | 14.8011942 |
| ZIF-8                        | SOD | TRAINING | Ar             | 9.569000  | 5.82300079 |
| ZIF-90                       | SOD | TRAINING | Ar             | 9.164000  | 8.61220514 |
| ZIF-CN                       | SOD | TRAINING | Ar             | 8.685000  | 8.33024853 |
| ZIF-COOH                     | SOD | TRAINING | Ar             | 10.450000 | 8.71646457 |

|                 |     |          |                    |           |            |
|-----------------|-----|----------|--------------------|-----------|------------|
| ZIF-NO2         | SOD | TRAINING | Ar                 | 9.085000  | 8.41520366 |
| ZIF-Cl          | SOD | TRAINING | Ar                 | 9.002000  | 3.28915145 |
| ZIF-71 (Cl2)    | RHO | TRAINING | Ar                 | 10.450000 | 8.95179664 |
| ZIF-93 (OH-CH3) | RHO | TRAINING | Ar                 | 11.800000 | 17.3384126 |
| ZIF-96 (CN-NH2) | RHO | TRAINING | Ar                 | 10.520000 | 18.6762199 |
| ZIF-97 (CH2-OH) | RHO | TRAINING | Ar                 | 13.980000 | 11.0539579 |
| ZIF-68          | GME | TRAINING | Ar                 | 10.560000 | 10.9242028 |
| ZIF-69(Cl)      | GME | TRAINING | Ar                 | 11.650000 | 14.254972  |
| ZIF-78(NO2)     | GME | TRAINING | Ar                 | 12.090000 | 15.5812619 |
| ZIF-79(CH3)     | GME | TRAINING | Ar                 | 12.050000 | 11.3126945 |
| ZIF-8           | SOD | TRAINING | H <sub>2</sub> S   | 19.190000 | 25.1144824 |
| ZIF-90          | SOD | TRAINING | H <sub>2</sub> S   | 19.590000 | 30.4705318 |
| ZIF-CN          | SOD | TRAINING | H <sub>2</sub> S   | 34.160000 | 33.2303346 |
| ZIF-COOH        | SOD | TRAINING | H <sub>2</sub> S   | 20.120000 | 28.907784  |
| ZIF-NO2         | SOD | TRAINING | H <sub>2</sub> S   | 19.590000 | 30.6080854 |
| ZIF-Cl          | SOD | TRAINING | H <sub>2</sub> S   | 16.970000 | 21.7105976 |
| ZIF-71 (Cl2)    | RHO | TRAINING | H <sub>2</sub> S   | 33.860000 | 27.2273076 |
| ZIF-93 (OH-CH3) | RHO | TRAINING | H <sub>2</sub> S   | 39.500000 | 39.783172  |
| ZIF-96 (CN-NH2) | RHO | TRAINING | H <sub>2</sub> S   | 30.350000 | 40.7662356 |
| ZIF-97 (CH2-OH) | RHO | TRAINING | H <sub>2</sub> S   | 38.660000 | 33.1324371 |
| ZIF-69(Cl)      | GME | TRAINING | H <sub>2</sub> S   | 48.210000 | 45.8307777 |
| ZIF-78(NO2)     | GME | TRAINING | H <sub>2</sub> S   | 62.360000 | 49.7912082 |
| ZIF-79(CH3)     | GME | TRAINING | H <sub>2</sub> S   | 34.890000 | 44.2728661 |
| ZIF-81(Br)      | GME | TRAINING | H <sub>2</sub> S   | 47.690000 | 45.3159146 |
| ZIF-90          | SOD | TRAINING | SO <sub>2</sub>    | 38.750000 | 35.4005201 |
| ZIF-COOH        | SOD | TRAINING | SO <sub>2</sub>    | 35.020000 | 33.6051219 |
| ZIF-NO2         | SOD | TRAINING | SO <sub>2</sub>    | 38.750000 | 35.5851806 |
| ZIF-Cl          | SOD | TRAINING | SO <sub>2</sub>    | 19.000000 | 26.1602879 |
| ZIF-71 (Cl2)    | RHO | TRAINING | SO <sub>2</sub>    | 34.850000 | 31.6565207 |
| ZIF-93 (OH-CH3) | RHO | TRAINING | SO <sub>2</sub>    | 41.380000 | 44.7948763 |
| ZIF-96 (CN-NH2) | RHO | TRAINING | SO <sub>2</sub>    | 55.970000 | 45.7289103 |
| ZIF-97 (CH2-OH) | RHO | TRAINING | SO <sub>2</sub>    | 41.350000 | 38.0941504 |
| ZIF-68          | GME | TRAINING | SO <sub>2</sub>    | 29.790000 | 43.6720204 |
| ZIF-69(Cl)      | GME | TRAINING | SO <sub>2</sub>    | 55.830000 | 52.1268659 |
| ZIF-78(NO2)     | GME | TRAINING | SO <sub>2</sub>    | 68.370000 | 56.4430015 |
| ZIF-79(CH3)     | GME | TRAINING | SO <sub>2</sub>    | 37.420000 | 50.7516137 |
| ZIF-81(Br)      | GME | TRAINING | SO <sub>2</sub>    | 55.530000 | 51.5543208 |
| ZIF-8           | SOD | TRAINING | CH <sub>3</sub> CN | 29.230000 | 39.7084678 |
| ZIF-CN          | SOD | TRAINING | CH <sub>3</sub> CN | 62.610000 | 58.383955  |
| ZIF-COOH        | SOD | TRAINING | CH <sub>3</sub> CN | 45.710000 | 45.1966562 |
| ZIF-NO2         | SOD | TRAINING | CH <sub>3</sub> CN | 82.220000 | 50.6626249 |
| ZIF-Cl          | SOD | TRAINING | CH <sub>3</sub> CN | 24.490000 | 34.6673781 |
| ZIF-71 (Cl2)    | RHO | TRAINING | CH <sub>3</sub> CN | 64.200000 | 39.9099068 |
| ZIF-93 (OH-CH3) | RHO | TRAINING | CH <sub>3</sub> CN | 66.230000 | 60.3164714 |
| ZIF-96 (CN-NH2) | RHO | TRAINING | CH <sub>3</sub> CN | 65.750000 | 60.625618  |

|                              |     |          |                               |            |            |
|------------------------------|-----|----------|-------------------------------|------------|------------|
| ZIF-97 (CH <sub>2</sub> -OH) | RHO | TRAINING | CH <sub>3</sub> CN            | 52.230000  | 52.974515  |
| ZIF-68                       | GME | TRAINING | CH <sub>3</sub> CN            | 55.960000  | 67.2844648 |
| ZIF-69(Cl)                   | GME | TRAINING | CH <sub>3</sub> CN            | 101.400000 | 83.5648227 |
| ZIF-78(NO <sub>2</sub> )     | GME | TRAINING | CH <sub>3</sub> CN            | 75.770000  | 92.4570565 |
| ZIF-79(CH <sub>3</sub> )     | GME | TRAINING | CH <sub>3</sub> CN            | 67.170000  | 84.5833698 |
| ZIF-81(Br)                   | GME | TRAINING | CH <sub>3</sub> CN            | 101.200000 | 82.3673903 |
| ZIF-8                        | SOD | TRAINING | C <sub>2</sub> H <sub>6</sub> | 16.310000  | 20.9181392 |
| ZIF-90                       | SOD | TRAINING | C <sub>2</sub> H <sub>6</sub> | 16.540000  | 23.7073435 |
| ZIF-CN                       | SOD | TRAINING | C <sub>2</sub> H <sub>6</sub> | 17.080000  | 23.4253869 |
| ZIF-COOH                     | SOD | TRAINING | C <sub>2</sub> H <sub>6</sub> | 21.930000  | 23.8116029 |
| ZIF-NO <sub>2</sub>          | SOD | TRAINING | C <sub>2</sub> H <sub>6</sub> | 16.540000  | 23.510342  |
| ZIF-Cl                       | SOD | TRAINING | C <sub>2</sub> H <sub>6</sub> | 17.260000  | 18.3842898 |
| ZIF-71 (Cl <sub>2</sub> )    | RHO | TRAINING | C <sub>2</sub> H <sub>6</sub> | 29.880000  | 24.046935  |
| ZIF-93 (OH-CH <sub>3</sub> ) | RHO | TRAINING | C <sub>2</sub> H <sub>6</sub> | 23.770000  | 32.433551  |
| ZIF-96 (CN-NH <sub>2</sub> ) | RHO | TRAINING | C <sub>2</sub> H <sub>6</sub> | 30.630000  | 33.7713583 |
| ZIF-97 (CH <sub>2</sub> -OH) | RHO | TRAINING | C <sub>2</sub> H <sub>6</sub> | 29.070000  | 26.1490962 |
| ZIF-68                       | GME | TRAINING | C <sub>2</sub> H <sub>6</sub> | 25.770000  | 26.0193412 |
| ZIF-79(CH <sub>3</sub> )     | GME | TRAINING | C <sub>2</sub> H <sub>6</sub> | 24.440000  | 26.4078329 |
| ZIF-8                        | SOD | TRAINING | H <sub>2</sub> O              | 13.600000  | 36.6955137 |
| ZIF-90                       | SOD | TRAINING | H <sub>2</sub> O              | 41.700000  | 43.3917061 |
| ZIF-CN                       | SOD | TRAINING | H <sub>2</sub> O              | 48.600000  | 47.7396842 |
| ZIF-COOH                     | SOD | TRAINING | H <sub>2</sub> O              | 50.850000  | 40.9589229 |
| ZIF-NO <sub>2</sub>          | SOD | TRAINING | H <sub>2</sub> O              | 72.550000  | 43.7042282 |
| ZIF-Cl                       | SOD | TRAINING | H <sub>2</sub> O              | 17.240000  | 32.8379607 |
| ZIF-71 (Cl <sub>2</sub> )    | RHO | TRAINING | H <sub>2</sub> O              | 40.840000  | 38.2784344 |
| ZIF-93 (OH-CH <sub>3</sub> ) | RHO | TRAINING | H <sub>2</sub> O              | 55.290000  | 53.0100605 |
| ZIF-96 (CN-NH <sub>2</sub> ) | RHO | TRAINING | H <sub>2</sub> O              | 92.100000  | 53.8085419 |
| ZIF-97 (CH <sub>2</sub> -OH) | RHO | TRAINING | H <sub>2</sub> O              | 50.140000  | 46.1689753 |
| ZIF-68                       | GME | TRAINING | H <sub>2</sub> O              | 30.670000  | 53.6695756 |
| ZIF-69(Cl)                   | GME | TRAINING | H <sub>2</sub> O              | 62.570000  | 63.8356511 |
| ZIF-78(NO <sub>2</sub> )     | GME | TRAINING | H <sub>2</sub> O              | 74.590000  | 69.1516064 |
| ZIF-79(CH <sub>3</sub> )     | GME | TRAINING | H <sub>2</sub> O              | 46.000000  | 62.9891497 |
| ZIF-81(Br)                   | GME | TRAINING | H <sub>2</sub> O              | 60.840000  | 63.1285149 |

## Bibliography

---

- 1 K. S. Park.; Z. Ni, A. P. Côté, J. Y. Choi, R. Huang, F.J. Uribe-Romo, H. K. Chae, M. O'Keefe, O. M. Yaghi, *Proc. Natl. Acad. Sci. U.S.A.* 2006, 103, 10186-10191
- 2 Banerjee, R.; Phan, A.; Wang, B.; Knobler, C.; Furukawa, H.; O'Keefe, M.; Yaghi, O. M. *Science* 2008, 319, 939–943
- 3 Liu, Y.; Kravtsov, V. Ch.; Larsen, R.; Eddaoudi, M. *Chem. Commun.* 2006, 1488–1490.
- 4 Huang, X.-C.; Lin, Y.-Y.; Zhang, J.-P.; Chen, X. M. *Angew. Chem., Int. Ed.* 2006, 45, 1557–1559.
- 5 Morris W., Leung B., Furukawa H., Yaghi O. K., He N., Hayashi H., Houndonoubo Y., Asta M., Laird B. B., and Yaghi O. M., *J. Am. Chem. Soc.*, 2010, 132, 11006
- 6 R.B. Rankin, J. Liu, A.D. Kulkarni, J.K. Johnson, *J. Phys. Chem. C*, Vol. 113, No. 39, 2009, 16906-16914
- 7 R. Babarao, S. Dai, D-e. Jiang, *J. Phys. Chem. C*, 2011, 115, 8126–8135
- 8 R. Banerjee, H. Furukawa, D. Britt, M. Knobler O'Keefe, O. Yaghi, *J. Am. Chem. Soc.* 2009, 131, 3875-3877
- 9 Liu Y., Liu H. L., Hu Y. and Jiang J. W., *J. Phys. Chem. B*, 2010, 114, 2820.
- 10 J. Liu, S. Keskin, David S. Sholl, J. Karl Johnson, *J. Phys. Chem. C* 2011, 115, 12560–12566
- 11 Aguado, S.; Bergeret, G.; Titus, M. P.; Moizan, V.; Nieto-Draghi, C.; Bats, N.; Farrusseng, D. *New J. of Chem.* 2011, 35, 546.
- 12 Gücüyener, C.; van den Bergh, J.; Gascon, J.; and Kapteijn, F. *J. Am. Chem. Soc.* 2010, 132, 17704.
- 13 Aguado, S.; Nicolas, C.H.; Moizan-Baslé, V.; Nieto, C.; Amrouche, H.; Bats, N.; Audebrand, N.; Farrusseng, D. *New J. Chem.* 2011, 35, 41.
- 14 Cambridge Crystallographic Data Center, <http://www.ccdc.cam.ac.uk/>
- 15 H. Amrouche, S. Aguado, J. Pérez-Pellitero, C. Chizallet, F. Siperstein, D. Farrusseng, N. Bats, Carlos Nieto-Draghi, *J. Phys. Chem. C*, 2011, 115 (33), 16425–16432
- 16 T. Düren, F. Millange, G. Férey, K.S. Walton and R.Q. Snurr *J. Phys. Chem. C*, 2007, Vol. 111, No.42
- 17 Materials Studio, Release 5.0, Accelrys Software Inc., San Diego, 2009.
- 18 Gharagheizi, F. *Energy and Fuels* 2008, 22, 3037.
- 19 Patel, S. J.; Ng, D.; Mannan, M. S. *Ind. Eng. Chem. Res.* 2009, 48, 7378.
- 20 Jaguar version 7.0, Schrödinger, LLC., New York, NY, 2007
- 21 a) Kresse, G.; Hafner, J. *Phys. Rev. B* 1994, 49, 14251-14269; b) Kresse, G.; Furthmüller, J. *Phys. Rev. B* 1996, 54, 11169:11161-11118
- 22 D. Frenkel, B. Smit in *Understanding Molecular Simulation: From Algorithms to Applications*, Academic Press, San Francisco, 2001
- 23 Vrabc, J.; Stoll, J.; Hasse, H. . *J. Phys. Chem. B* 2001, 105, 12126.
- 24 D. Moller, J. Oprzynski, A. Muller, J. Fischer, *Molecular Physics*, 1992, 75, 363
- 25 Ungerer, P.; Beauvais, C.; Delhommelle, J.; Boutin, A.; Rousseau, B.; Fuchs, A. *J. Chem. Phys.* 2000, 112, 5499.
- 26 J. Delhommelle, PhD Thesis, Université de Paris XI, Orsay, France, 2000
- 27 Y. Boutard, Ph. Ungerer, J.M. Teuler, M.G. Ahunbay, S.F. Sabater, J. Perez-Pellitero, A.D. Mackie, E. Bourasseau, *Fluid Phase Equilib.* 236 (2005) 25–41.
- 28 G. Harris and K. H. Yung, *J. Phys. Chem.*, 1995, 99, 12021.
- 29 J. Pérez-Pellitero, H. Amrouche, F. Siperstein, G. Pirngruber, C. Nieto-Draghi, G. Chaplais, A. Simon-Masseron, D. Bazer-Bachi, D. Peralta and N. Bats, *Chem.–Eur. J.*, 2010, 16, 1560–1571



- 30 E. El Ahmar, B. Creton, A. Valtz, C. Coquelet, V. Lachet, D. Richon, P. Ungerer, *Fluid Phase Equilibria* 304 , 2011, 21–34
- 31 Kristóf, T.; Liszi, J. J. *Phys. Chem. B* 1997, 101, 5480.
- 32 Edwards, D. M. F.; Madden, P. A.; McDonald, I. R. *Mol. Phys.* 1984, 51, 1141.
- 33 Jorgensen, W. L.; Madura, J. D.; Impey, R. W.; Klein, M. L. *J. Chem. Phys.* 1983, 79, 926.
- 34 Ungerer, P.; Nieto-Draghi, C.; Lachet, V.; Wender, A.; di Lella, A.; Boutin, A.; Rousseau, B and Fuchs, A. *Mol. Sim.*, 2007, 33, 287-304
- 35 A. D. Mackie, B. Tavitian, A. Boutin, A. H. Fuchs, *Mol. Phys.*, 1992, 75, 363-378
- 36 M. P. Allen, D. J. Tildesley in *Computer Simulation of Liquids*, Oxford University Press, New York, 1989
- 37 T. Vuong, P. A. Monson, *Langmuir*, 1996, 12, 5425-5432
